# Supplementary material for: Genetic Diversity in HIV-1 Subtype C LTR from Brazil and Mozambique Generates New Transcription Factor-Binding Sites
Source: MDPI journal article supplement (doi:10.3390/v6062495), 2014-06-23

# Genetic Diversity in HIV-1 Subtype C LTR from Brazil and Mozambique Generates New Transcription Factor-Binding Sites

José Boullosa, Mahesh Bachu, Dulce Bila, Udaykumar Ranga, Theodoro Süffert, Tomoko Sasazawa and Amilcar Tanuri

**Supplementary Figure S1.** Rooted neighbor-joining tree based on long terminal repeat (LTR) sequences of Mozambican HIV-1 isolates (marked with ●). HIV-1 subtype reference sequences were obtained from the GenBank databases and the accession numbers are shown in figure. The tree was rooted using an SIV sequence. Only bootstrap values >70% are shown.

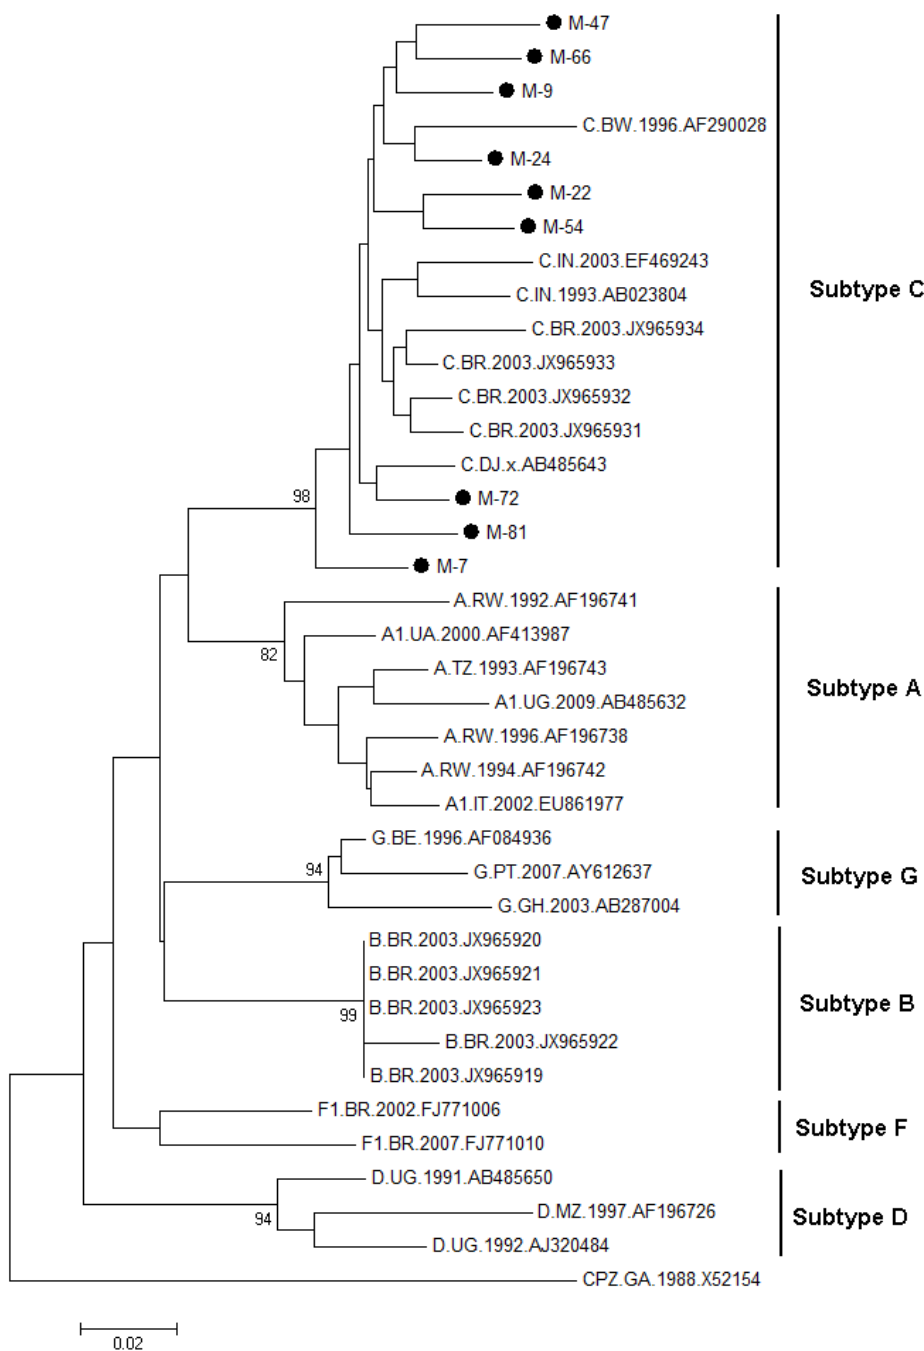

**Supplementary Figure 2.** Rooted neighbor-joining tree based on long terminal repeat (LTR) sequences of Brazilian HIV-1 isolates. The subtype C isolates is marked with ●, the subtype B isolate is marked with ■ and the subtype D isolate is marked with ◆. HIV-1 subtype reference sequences were obtained from the GenBank databases and the accession numbers are shown in figure. The tree was rooted using an SIV sequence. Only bootstrap values >70% are shown.

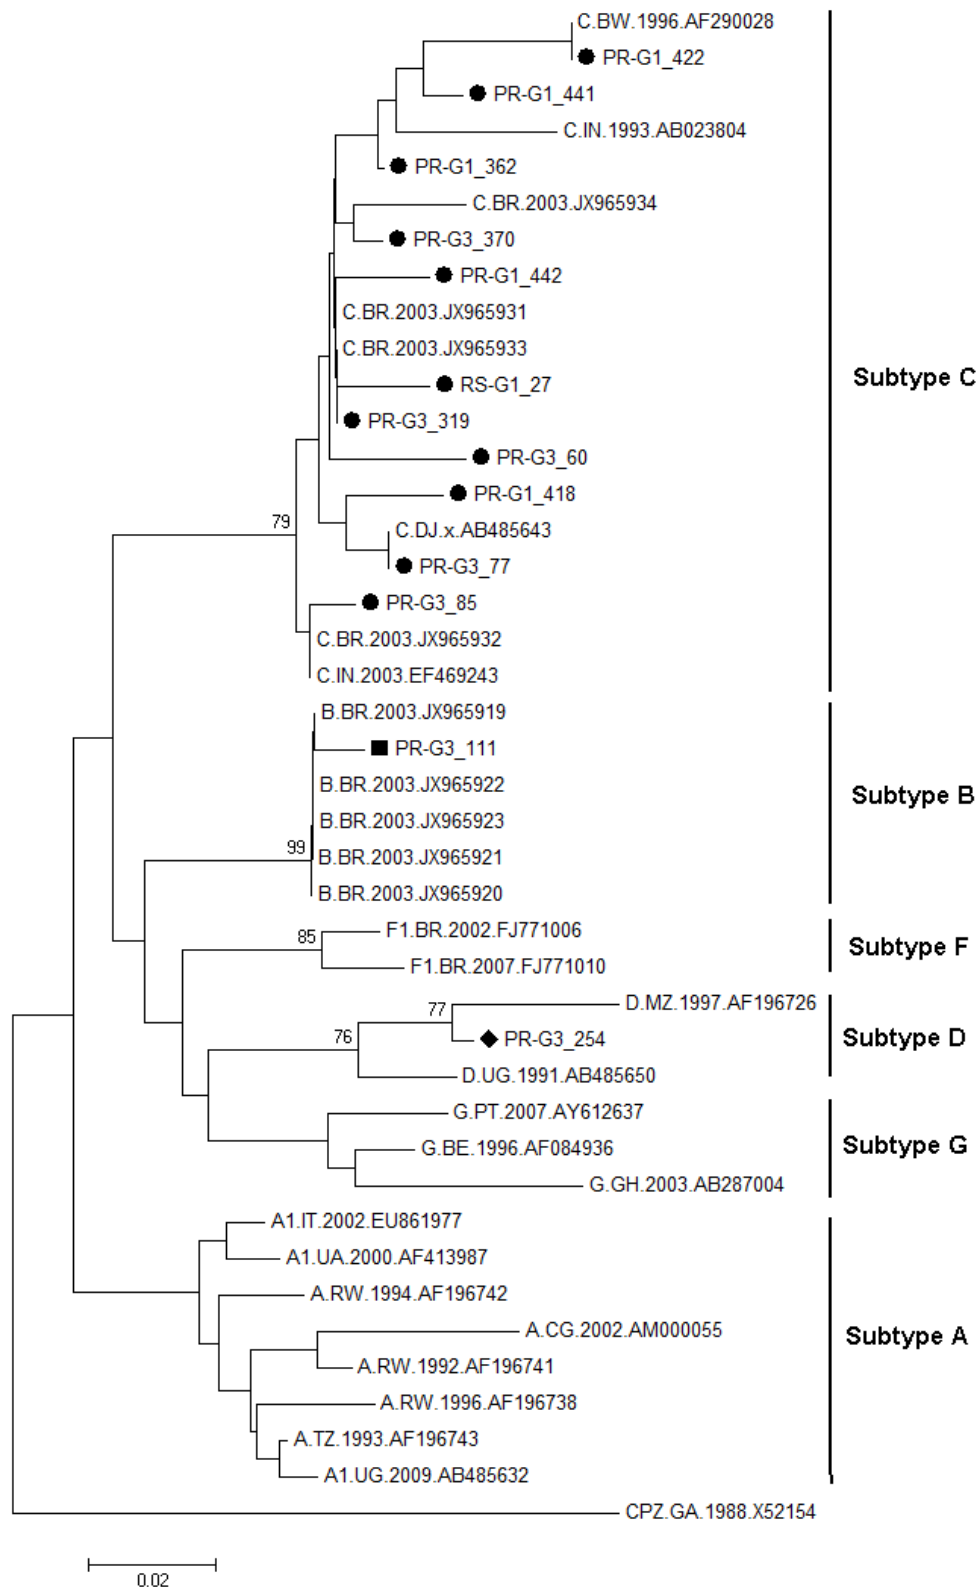

**Supplementary Figure 3.** Rooted neighbor-joining tree based on long terminal repeat (LTR) sequences of Brazilian HIV-1 isolates (marked with ●). HIV-1 subtype reference sequences were obtained from the GenBank databases and the accession numbers are shown in figure. The tree was rooted using an SIV sequence. Only bootstrap values >70% are shown.

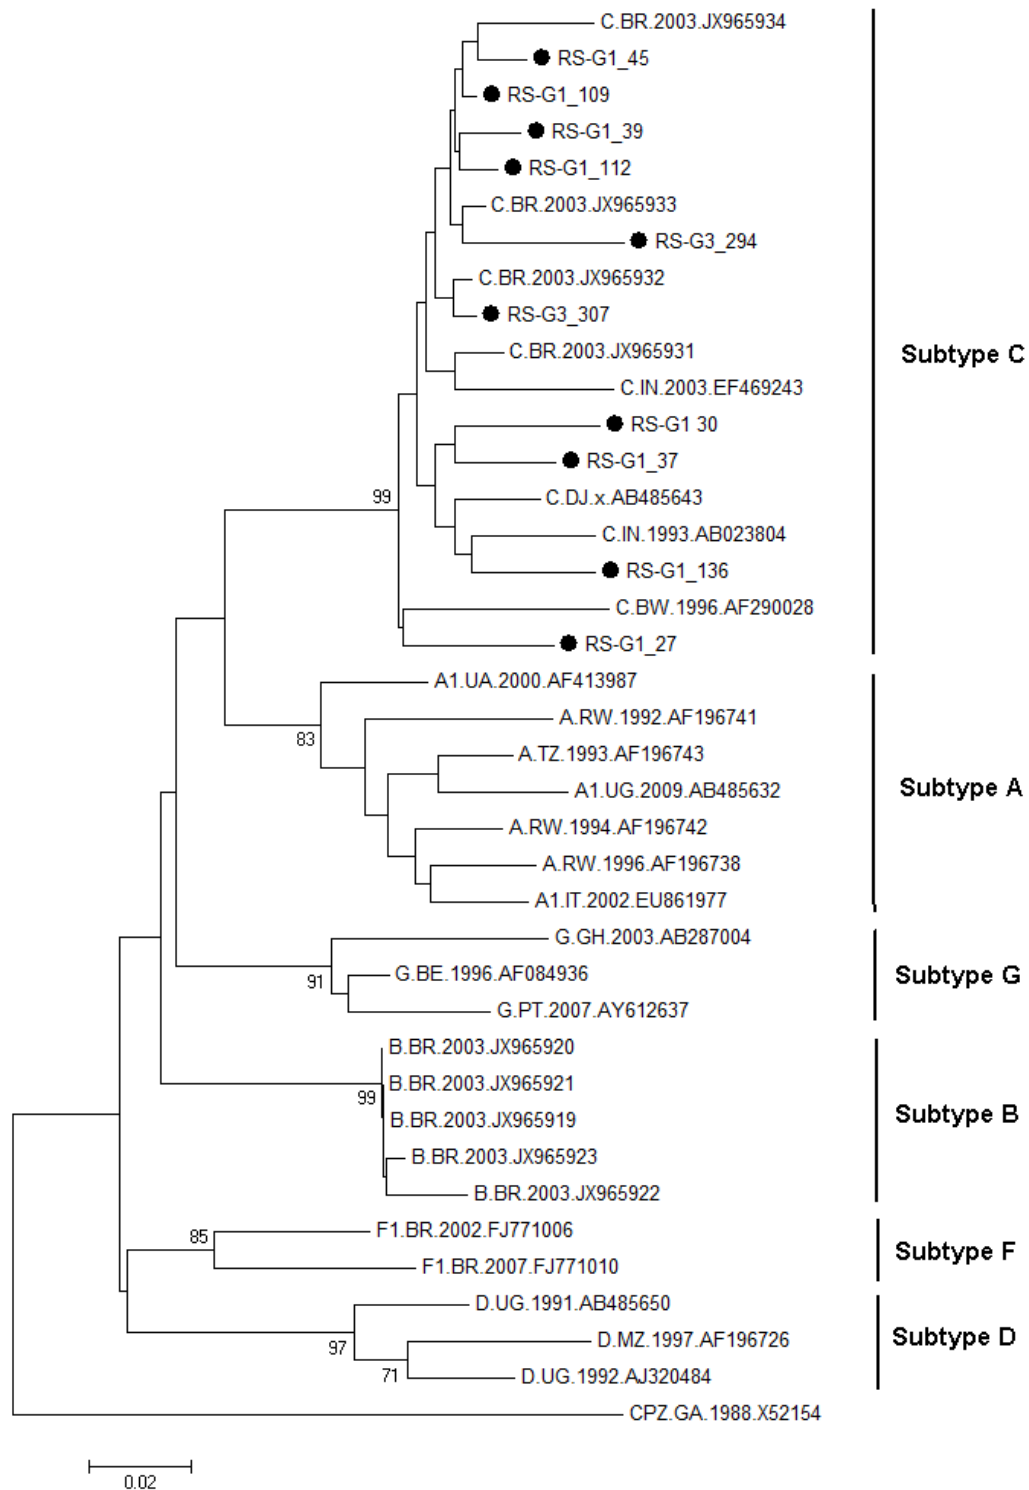

Supplement: s1 [file s1]
